# Supplementary material for: Discovery of Active Ingredients Targeted TREM2 by SPR Biosensor-UPLC/MS Recognition System, and Investigating the Mechanism of Anti-Neuroinflammatory Activity on the Lignin-Amides from Datura metel Seeds
Source: MDPI journal article supplement (doi:10.3390/molecules26195946), 2021-09-30
Supplement: s1 [file s1]

---

## Supporting Information

Article

# Discovery of Active Ingredients Targeted TREM2 by SPR Biosensor-UPLC/MS Recognition System, and Investigating the Mechanism of Anti-neuroinflammatory Activity on the Lignin-amides from *Datura metel* Seeds

Si-Yi Wang <sup>†</sup>, Yan Liu <sup>†</sup>, Xiao-Mao Li, Adnan Mohammed Algradi, Hai Jiang, Yan-Ping Sun, Wei Guan, Juan Pan, Hai-Xue Kuang\* and Bing-You Yang\*

Key Laboratory of Chinese Materia, Heilongjiang University of Chinese Medicine, Ministry of Education, Harbin 150040, China; WSY06182021@163.com (S.Y.W.); lifeliuyan@163.com (Y.L.); 18216074841@163.com (X.M.L), dradnan86@hotmail.com (A.M.A); JiangHai\_777@126.com (H.J.); 18704608056@163.com (Y.P.S.); myguanwei1234@yeah.net (W.G.); panjuan1002@hotmail.com (J.P)

\* Correspondence: yangbingyou@hljucm.net (B.Y.Y.); hxkuang@yahoo.com (H.X.K.)

## Contents:

**Figure S1.** Mass spectrum of standard substance for peak 1 from the TREM2-binding

**Figure S2.** Mass spectrum of standard substance for peak 3 from the TREM2-binding

**Figure S3.** Mass spectrum of standard substance for peak 4 from the TREM2-binding

**Figure S4.** Mass spectrum of peak 1 from the LDS

**Figure S5.** Mass spectrum of peak 2 from the LDS

**Figure S6.** Mass spectrum of peak 3 from the LDS

**Figure S7.** Mass spectrum of peak 4 from the LDS

**Figure S8.** Mass spectrum of peak 5 from the LDS

**Figure S9.** Mass spectrum of peak 6 from the LDS

**Figure S10.** Mass spectrum of peak 7 from the LDS

**Figure S11.** Mass spectrum of peak 8 from the LDS

**Figure S12.** Mass spectrum of peak 9 from the LDS

**Figure S13.** Mass spectrum of peak 10 from the LDS

**Figure S14.** Mass spectrum of peak 11 from the LDS

**Figure S15.** Mass spectrum of peak 12 from the LDS

**Figure S31.** Kruskal-Wallis analysis results for each group

**Table S2.** The results for Dap12 of Kruskal-Wallis

**Table S4.** The results for COX-2 of Kruskal-Wallis

**Table S6.** The results for MyD88 of Kruskal-Wallis

**Table S8.** The results for Caspase-1 of Kruskal-Wallis

**Figure S16.** Mass spectrum of peak 13 from the LDS

**Figure S17.** Mass spectrum of peak 14 from the LDS

**Figure S18.** Mass spectrum of peak 15 from the LDS

**Figure S19.** Mass spectrum of peak 16 from the LDS

**Figure S20.** Mass spectrum of peak 17 from the LDS

**Figure S21.** Mass spectrum of peak 18 from the LDS

**Figure S22.** Mass spectrum of peak 19 from the LDS

**Figure S23.** Mass spectrum of peak 20 from the LDS

**Figure S24.** Mass spectrum of peak 21 from the LDS

**Figure S25.** Mass spectrum of peak 22 from the LDS

**Figure S26.** Mass spectrum of peak 23 from the LDS

**Figure S27.** Mass spectrum of peak 24 from the LDS

**Figure S28.** Mass spectrum of peak 25 from the LDS

**Figure S29.** Mass spectrum of peak 26 from the LDS

**Figure S30.** Mass spectrum of peak 27 from the LDS

**Table S1.** The results for TREM2 of Kruskal-Wallis

**Table S3.** The results for iNOS of Kruskal-Wallis

**Table S5.** The results for TLR4 of Kruskal-Wallis

**Table S7.** The results for NLRP3 of Kruskal-Wallis

**Table S9.** The results for IBA-1 of Kruskal-Wallis

**Citation:** Wang, S.-Y.; Liu, Y.; Li, X.-M.; Algradi, A.M.; Jiang, H.; Sun, Y.-p.; Guan, W.; Pan, J.; Kuang, H.-X.; Yang, B.-Y.; et al. Discovery of active ingredients targeted TREM2 by SPR biosensor-UPLC/MS recognition system, and investigating the mechanism of anti-neuroinflammatory activity on the lignin-amides from *Datura metel* seeds. 2021, 24, x.  
<https://doi.org/10.3390/xxxxx>

Academic editor: Paola Barraja

Received: 1 September 2021

Accepted: 27 September 2021

Published: date

**Publisher's Note:** MDPI stays neutral with regard to jurisdictional claims in published maps and institutional affiliations.

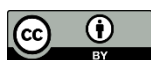

**Copyright:** © 2021 by the authors. Submitted for possible open access publication under the terms and conditions of the Creative Commons Attribution (CC BY) license (<http://creativecommons.org/licenses/by/4.0/>).

---

**Table S10.** The results for p-Tau/Tau of Kruskal-Wallis

**Figure S1.** Mass spectrum of standard substance for peak 1 from the TREM2-binding

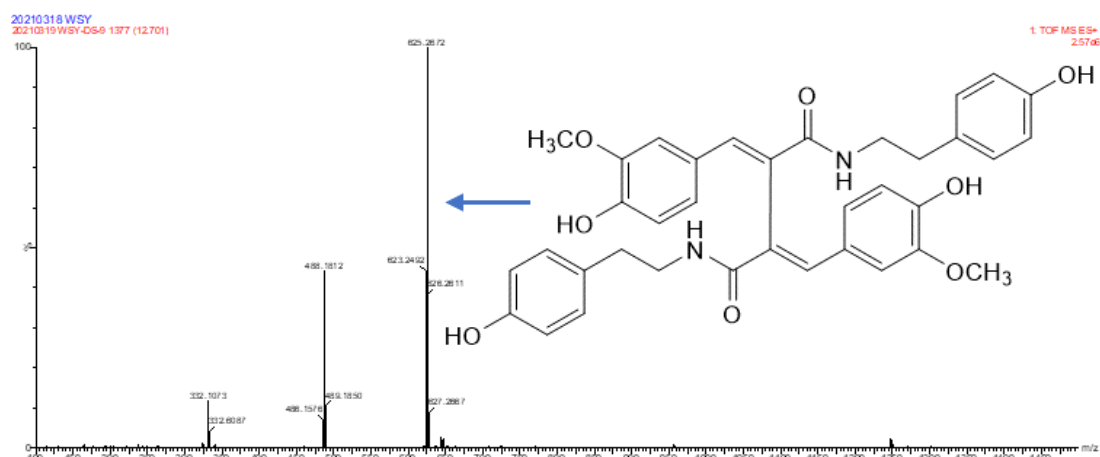

**Figure S2.** Mass spectrum of standard substance for peak 3 from the TREM2-binding

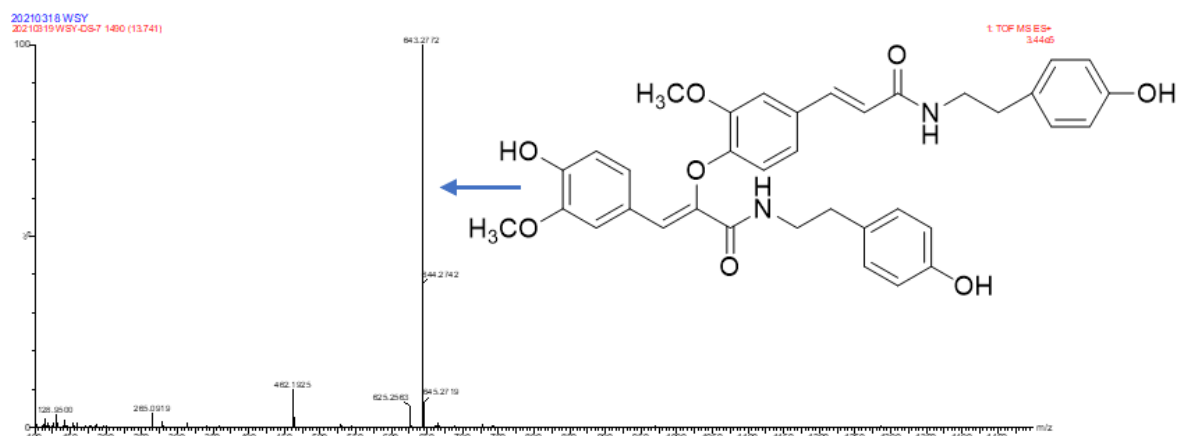

**Figure S3.** Mass spectrum of standard substance for peak 4 from the TREM2-binding

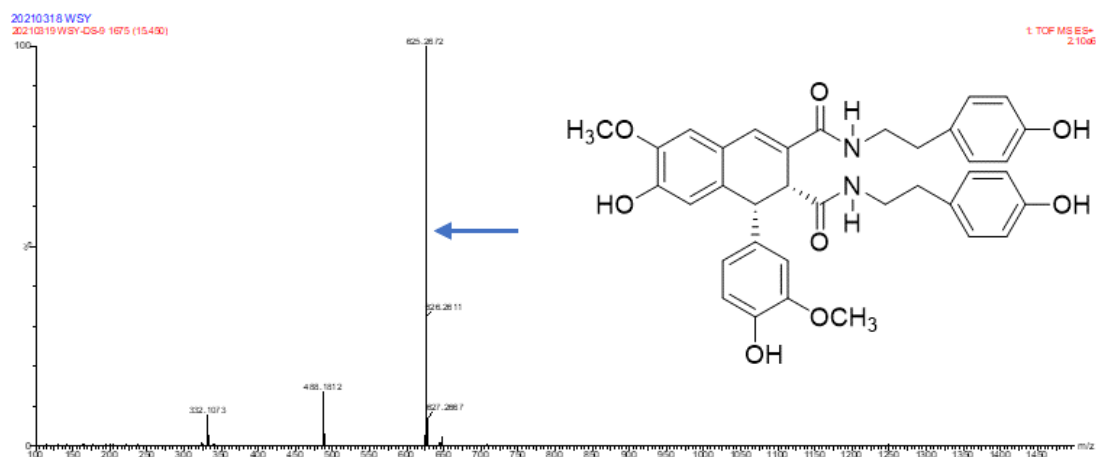

**Figure S4.** Mass spectrums of peak 1 from the LDS

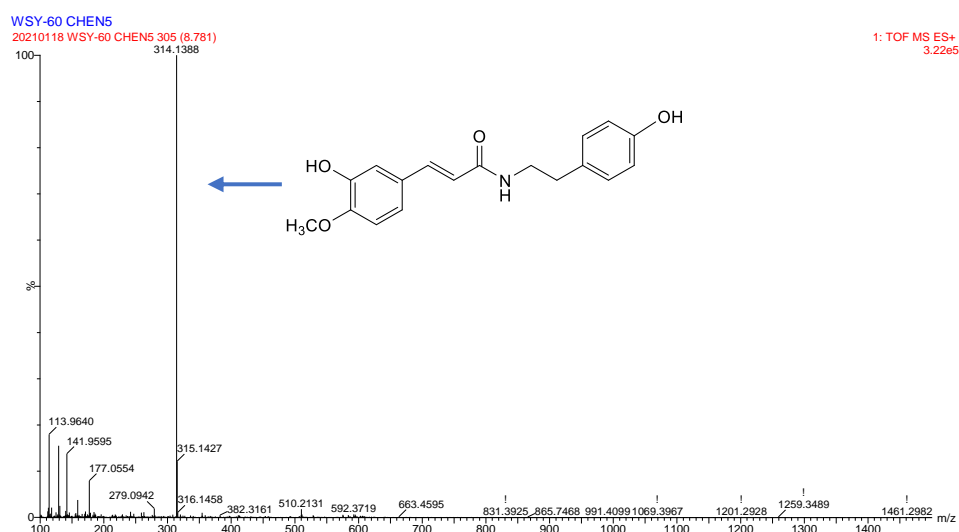

**Figure S5.** Mass spectrum of peak 2 from the LDS

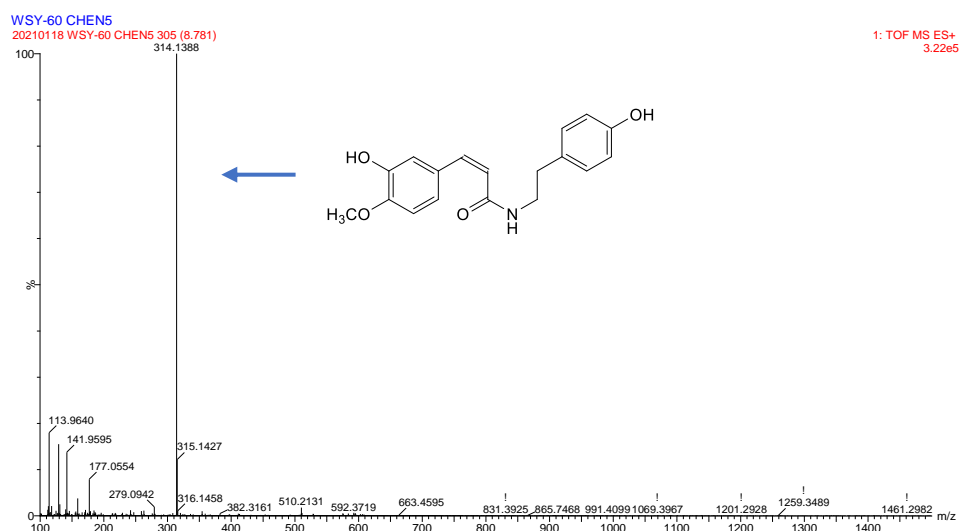

**Figure S6.** Mass spectrum of peak 3 from the LDS

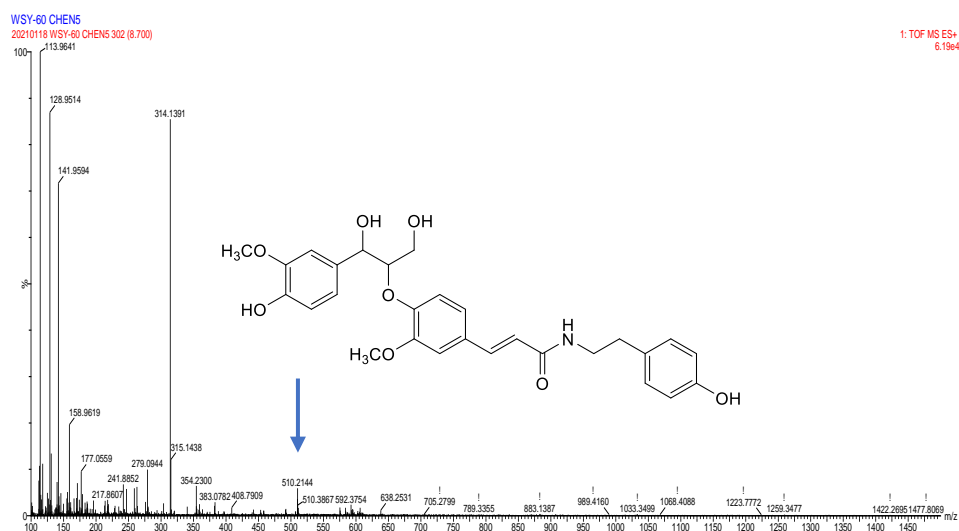

**Figure S7.** Mass spectrum of peak 4 from the LDS

WSY-60 CHEN5  
20210118 WSY-60 CHEN5 431 (12.405)

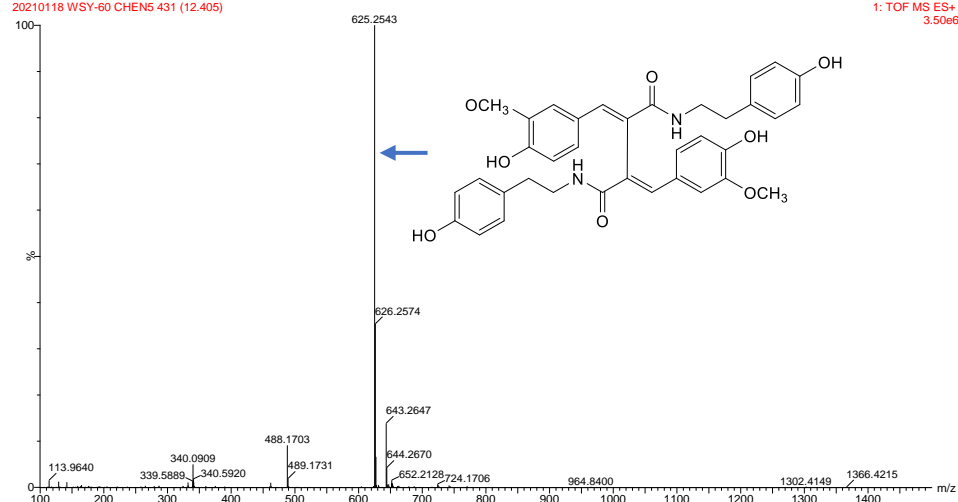

**Figure S8.** Mass spectrum of peak 5 from the LDS

WSY-60 CHEN5  
20210118 WSY-60 CHEN5 435 (12.513)

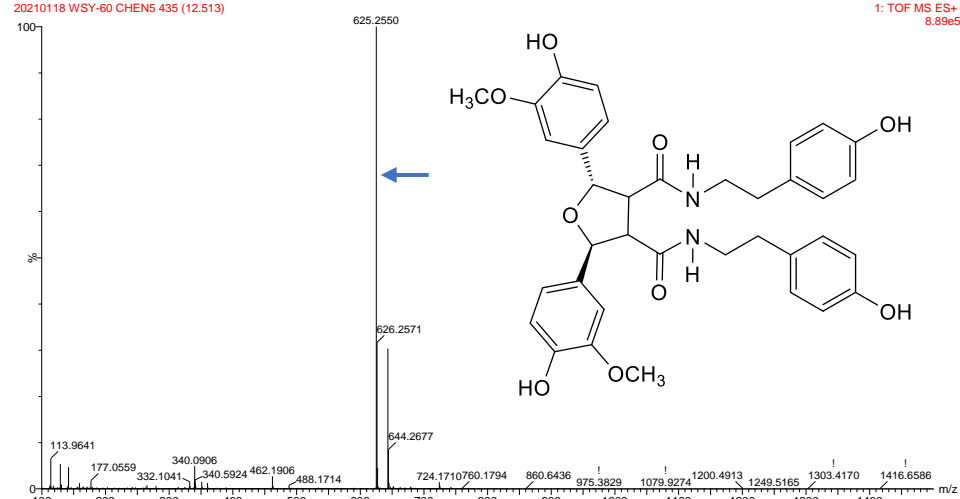

**Figure S9.** Mass spectrum of peak 6 from the LDS

WSY-60 CHEN5  
20210118 WSY-60 CHEN5 443 (12.749)

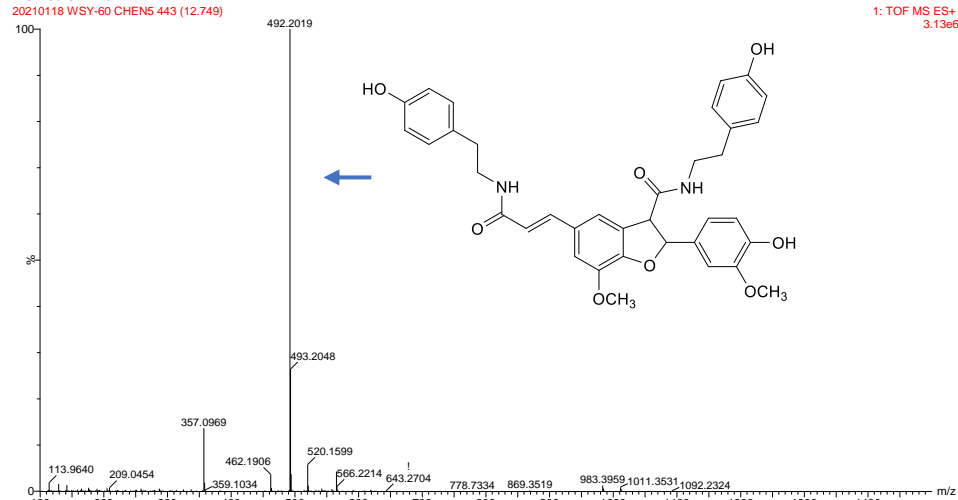

**Figure S10.** Mass spectrum of peak 7 from the LDS

WSY-60 CHEN5

20210118 WSY-60 CHEN5 444 (12.776)

1: TOF MS ES+  
3.40e6

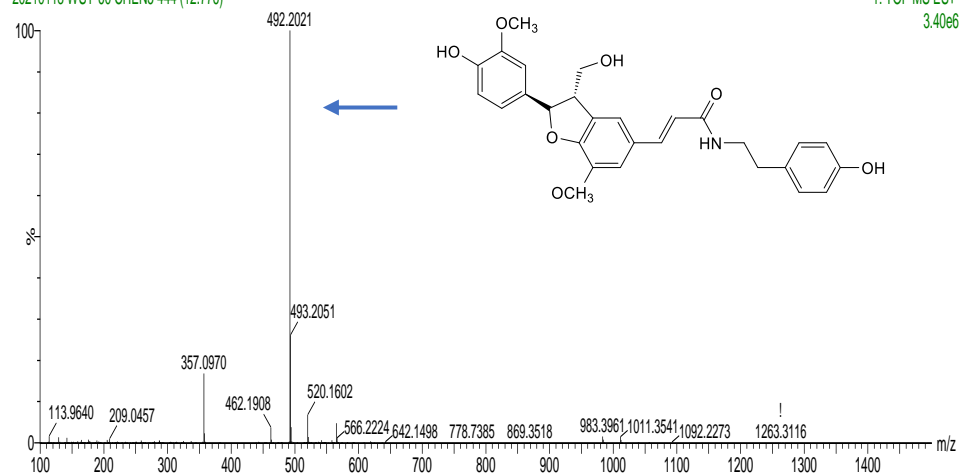

**Figure S11.** Mass spectrum of peak 8 from the LDS

WSY-60 CHEN5

20210118 WSY-60 CHEN5 444 (12.776)

1: TOF MS ES+  
3.40e6

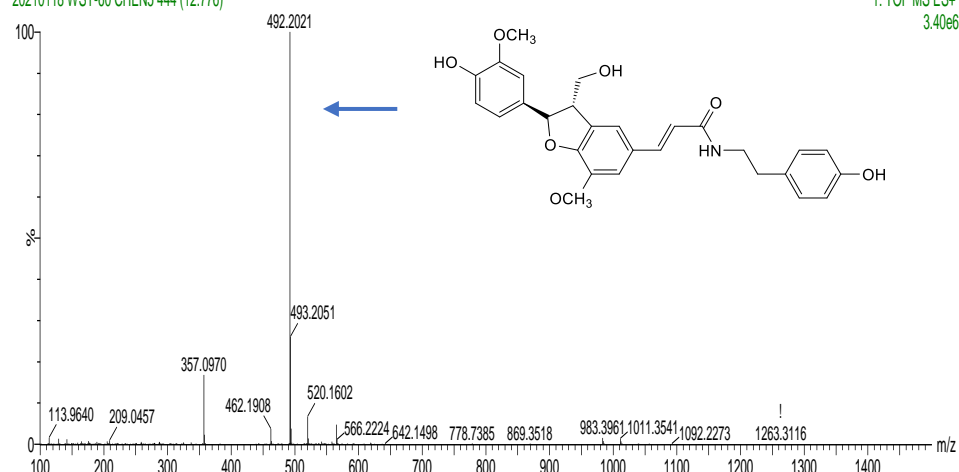

**Figure S12.** Mass spectrum of peak 9 from the LDS

WSY-60 CHEN5

20210118 WSY-60 CHEN5 455 (13.093)

1: TOF MS ES+  
1.08e6

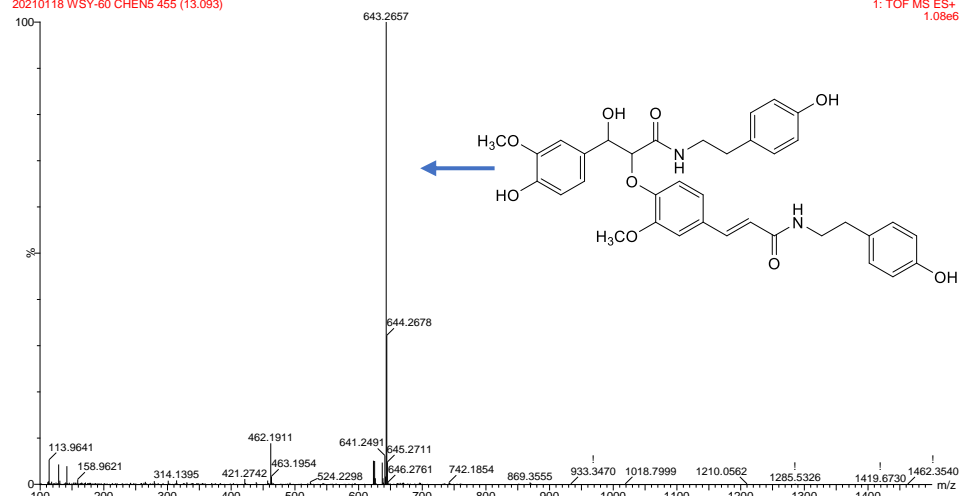

**Figure S13.** Mass spectrum of peak 10 from the LDS

WSY-60 CHEN5  
20210118 WSY-60 CHEN5 469 (13.492)

1: TOF MS ES+  
2.36e5

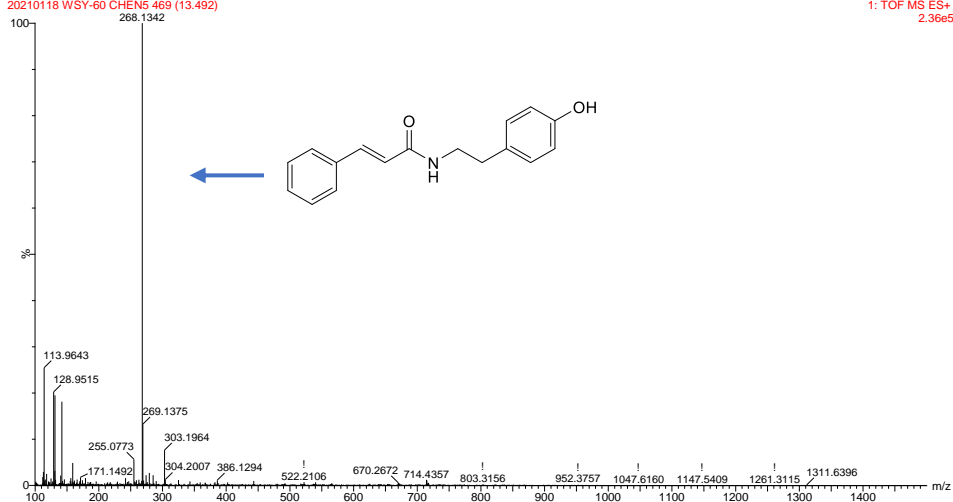

**Figure S14.** Mass spectrum of peak 11 from the LDS

WSY-60 CHEN5  
20210118 WSY-60 CHEN5 483 (13.890)

1: TOF MS ES+  
6.77e5

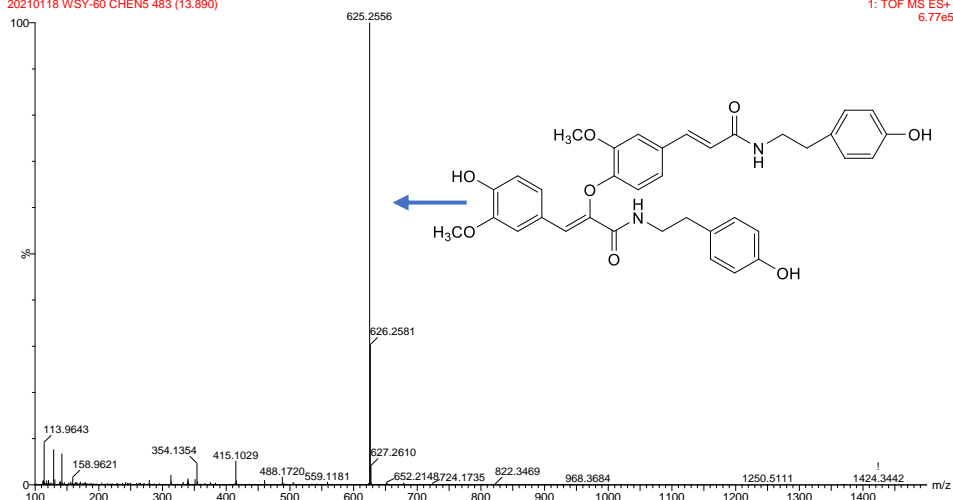

**Figure S15.** Mass spectrum of peak 12 from the LDS

WSY-60 CHEN5  
20210118 WSY-60 CHEN5 523 (15.050)

1: TOF MS ES+  
6.71e5

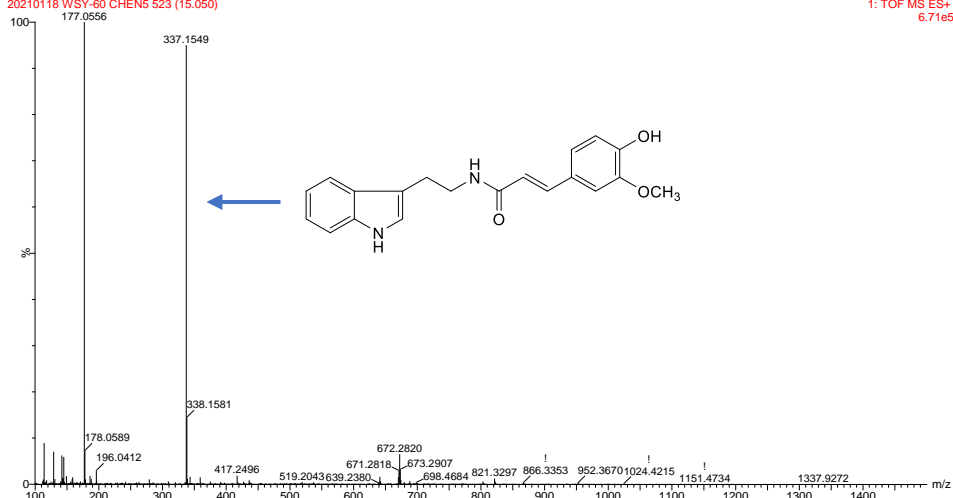



**Figure S16.** Mass spectrum of peak 13 from the LDS

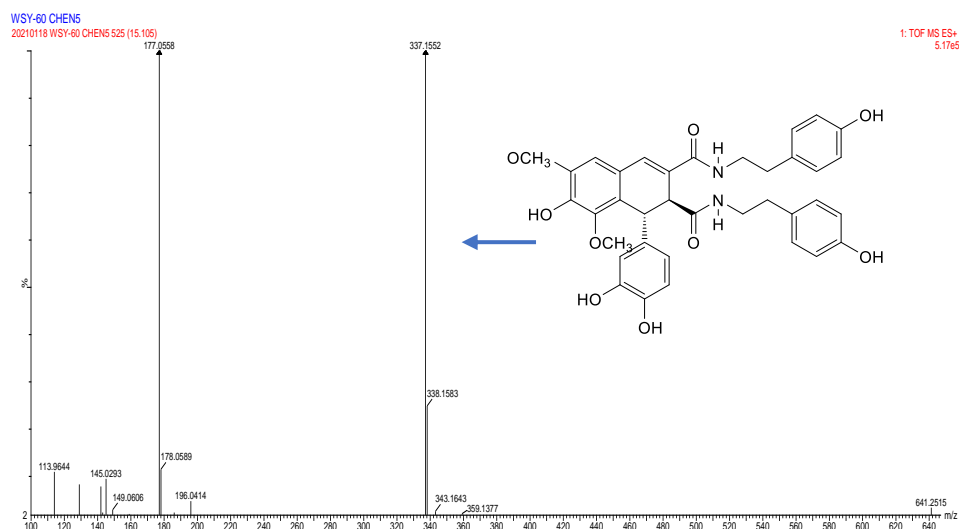

**Figure S17.** Mass spectrum of peak 14 from the LDS

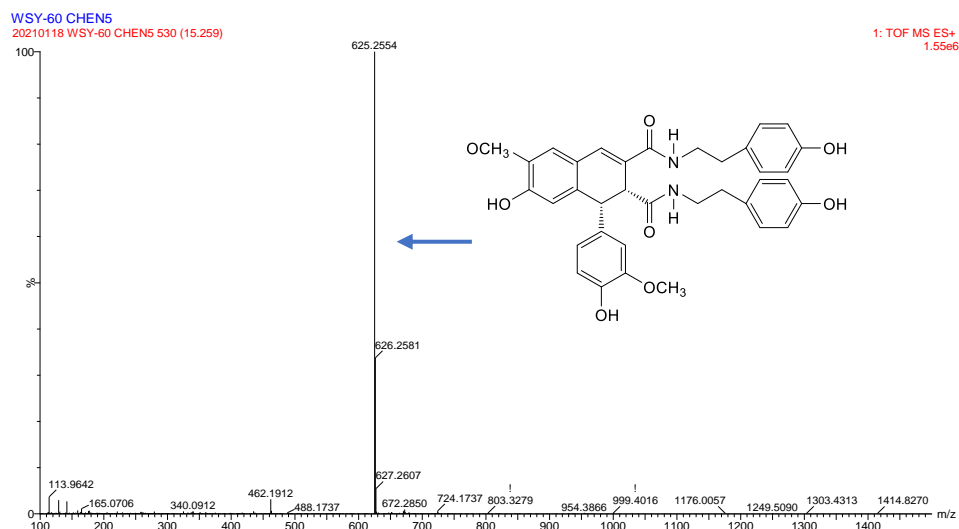

**Figure S18.** Mass spectrum of peak 15 from the LDS

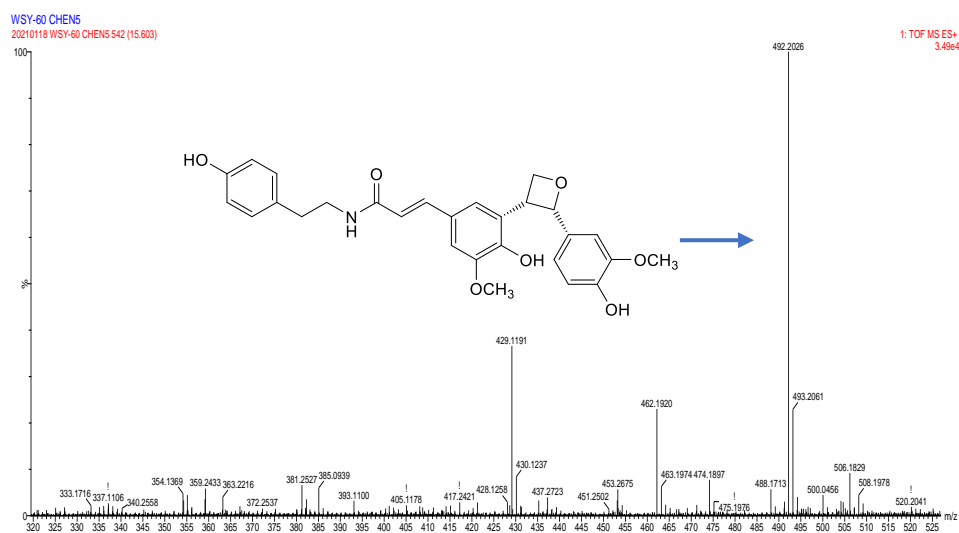

**Figure S19.** Mass spectrum of peak 16 from the LDS

WSY-60 CHEN5  
20210118 WSY-60 CHEN5 551 (15.847)

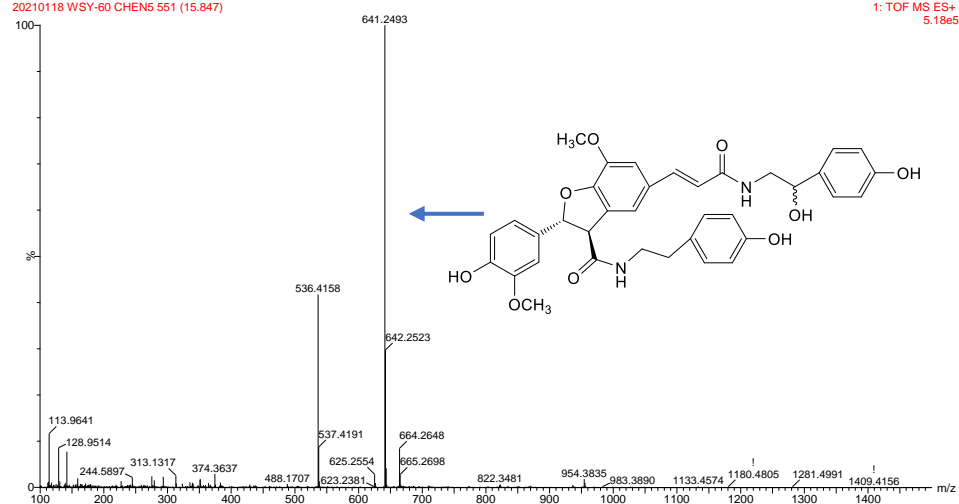

**Figure S20.** Mass spectrum of peak 17 from the LDS

WSY-60 CHEN5  
20210118 WSY-60 CHEN5 573 (16.481)

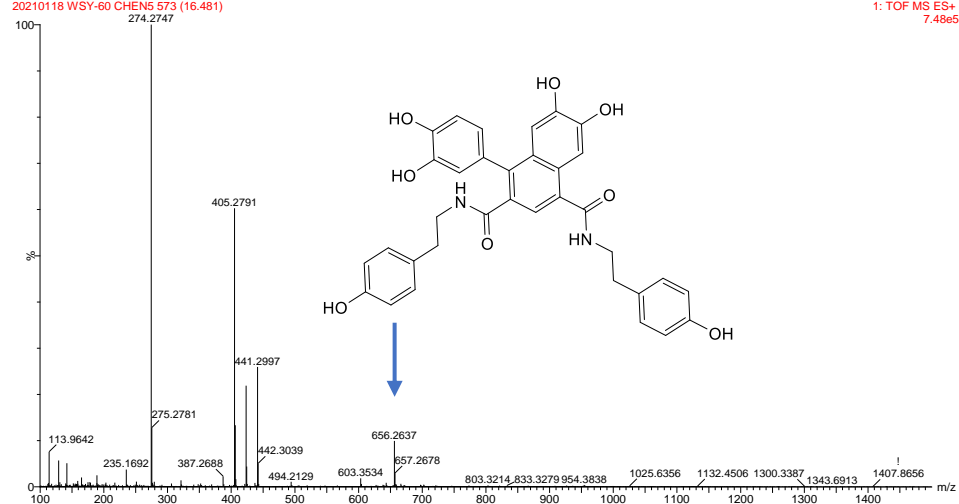

**Figure S21.** Mass spectrum of peak 18 from the LDS

WSY-60 CHEN5  
20210118 WSY-60 CHEN5 593 (17.061)

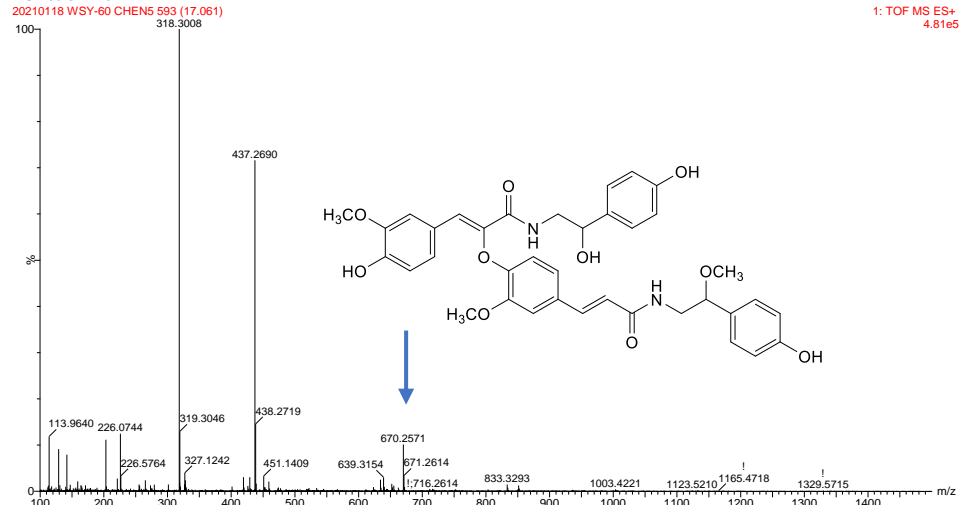

**Figure S22.** Mass spectrum of peak 19 from the LDS

WSY-60 CHEN5

20210118 WSY-60 CHEN5 603 (17.351)

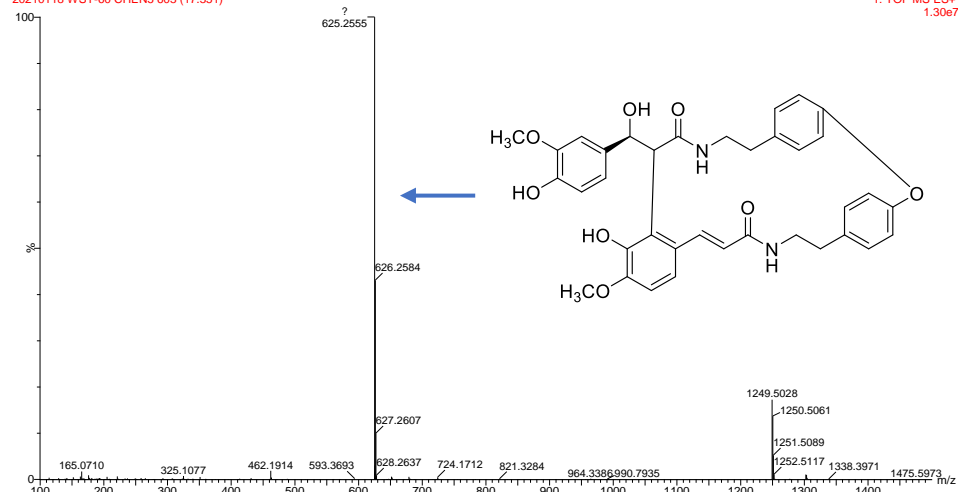

**Figure S23.** Mass spectrum of peak 20 from the LDS

WSY-60 CHEN5

20210118 WSY-60 CHEN5 614 (17.668)

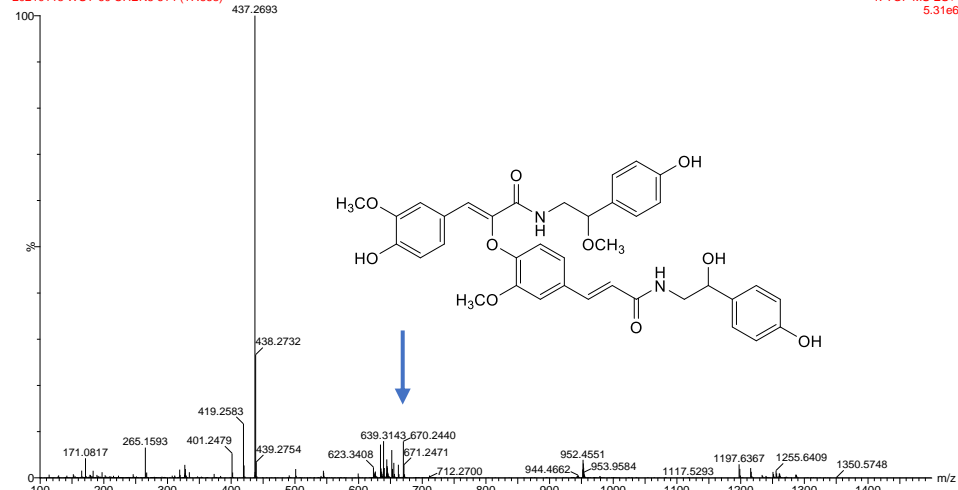

**Figure S24.** Mass spectrum of peak 21 from the LDS

WSY-60 CHEN5

20210118 WSY-60 CHEN5 621 (17.858)

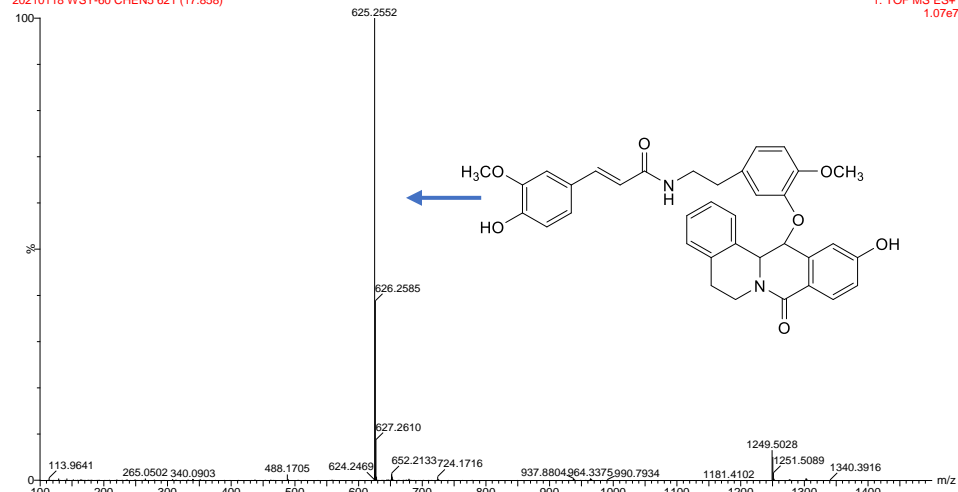

**Figure S25.** Mass spectrum of peak 22 from the LDS

WSY-60 CHEN5  
20210118 WSY-60 CHEN5 656 (18.864)

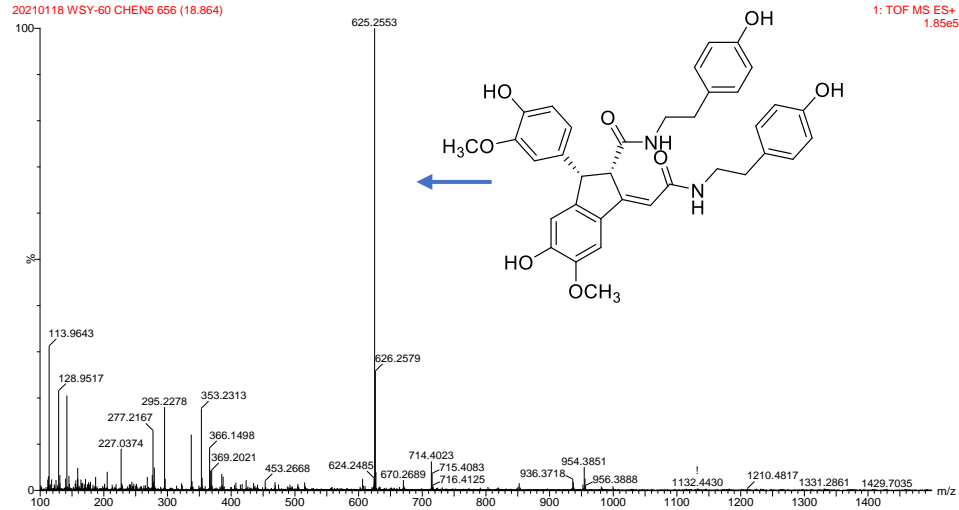

**Figure S26.** Mass spectrum of peak 23 from the LDS

WSY-60 CHEN5  
20210118 WSY-60 CHEN5 668 (19.226)

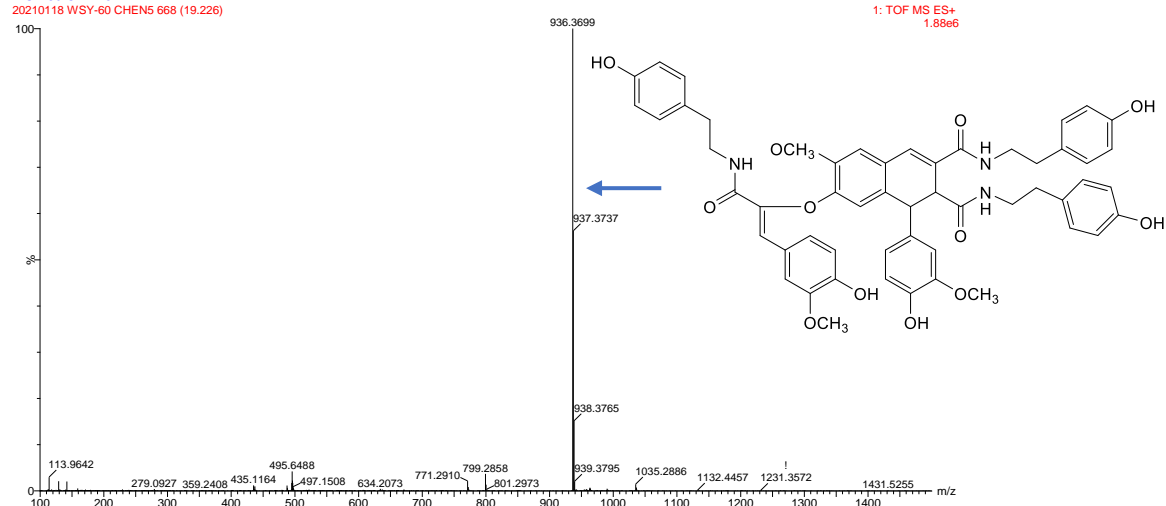

**Figure S27.** Mass spectrum of peak 24 from the LDS

WSY-60 CHEN5  
20210118 WSY-60 CHEN5 542 (15.603)

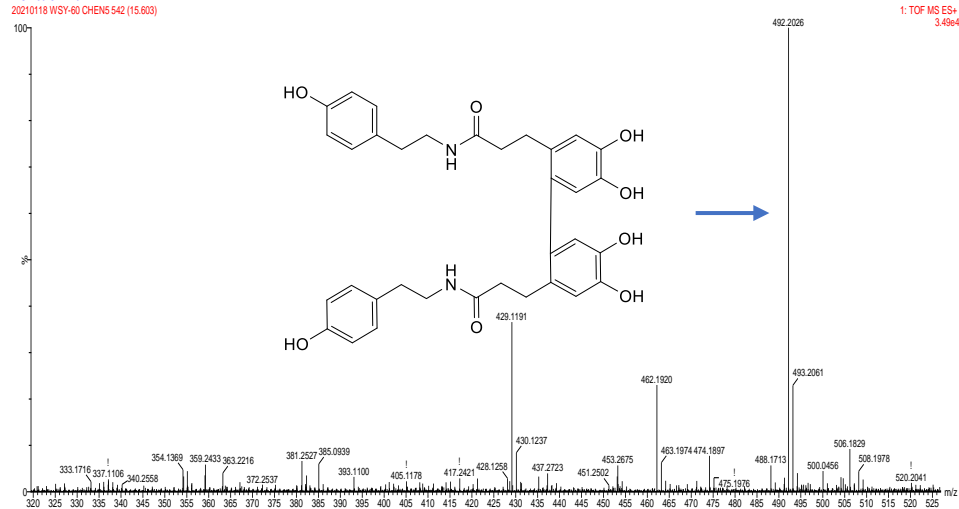

**Figure S28.** Mass spectrum of peak 25 from the LDS

WSY-60 CHEN5

20210118 WSY-60 CHEN5 771 (22.170)

1: TOF MS ES+  
8.91e5

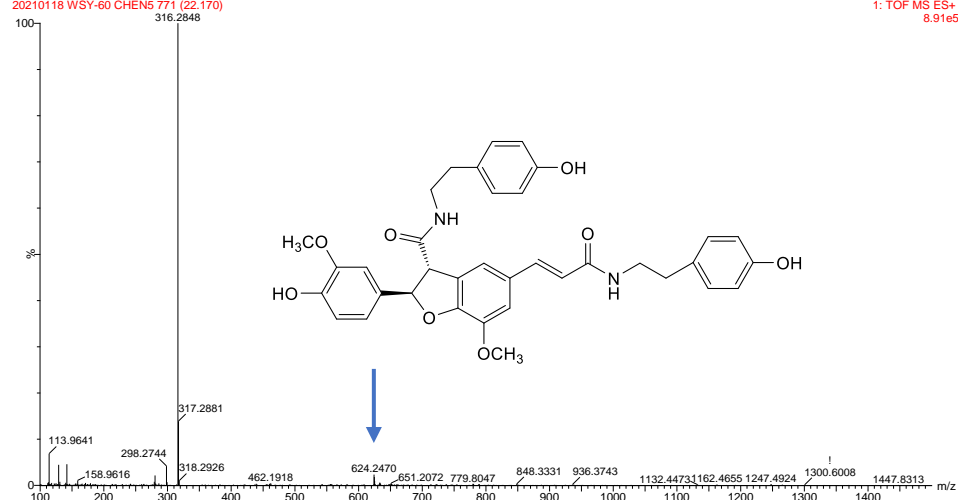

**Figure S29.** Mass spectrum of peak 26 from the LDS

WSY-60 CHEN5

20210118 WSY-60 CHEN5 807 (23.222)

1: TOF MS ES+  
9.59e5

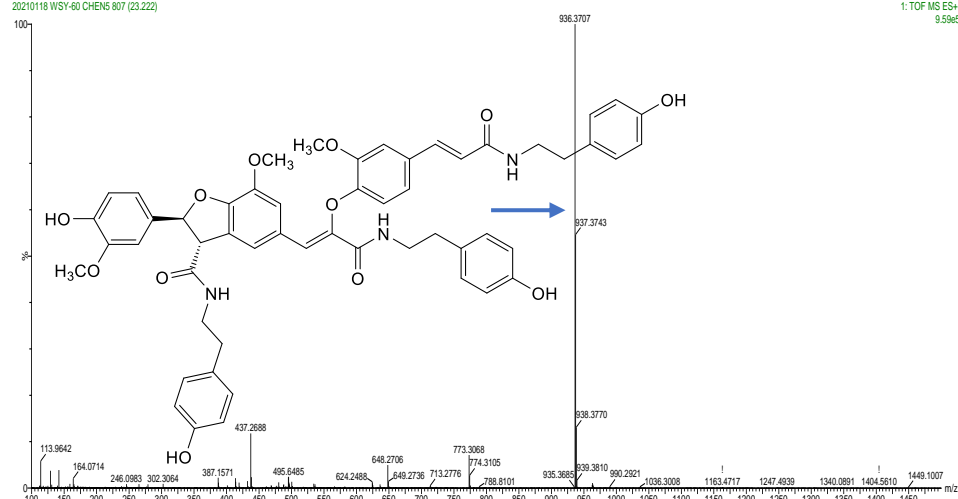

**Figure S30.** Mass spectrum of peak 27 from the LDS

WSY-60 CHEN5

20210118 WSY-60 CHEN5 832 (23.937)

1: TOF MS ES+  
2.21e6

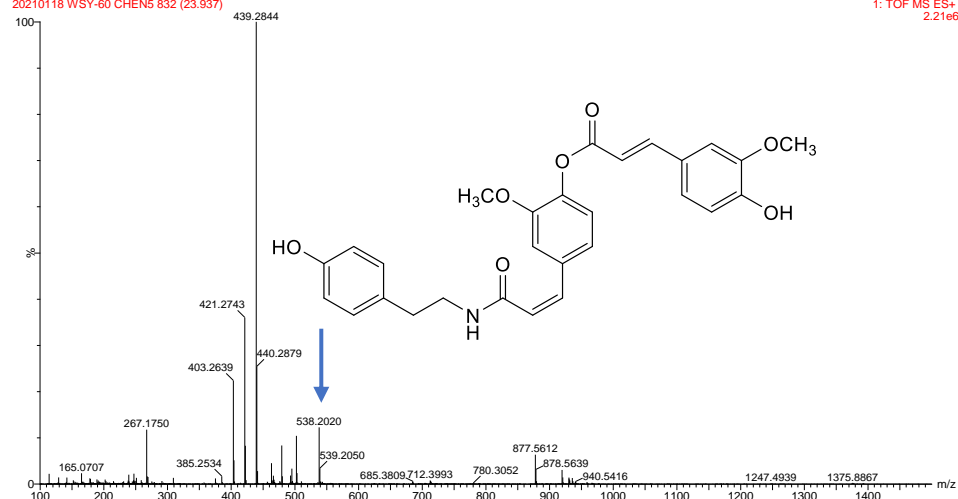

**Figure S31.** Kruskal-Wallis analysis results for each group

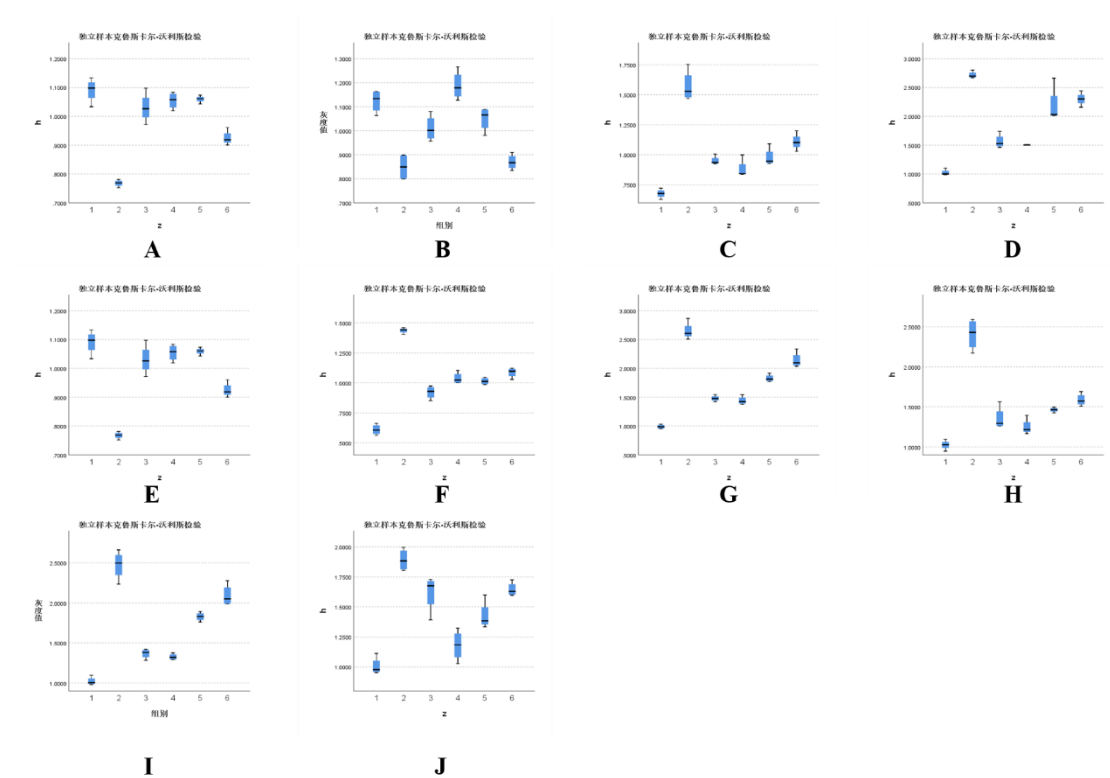

Kruskal-Wallis analysis results for each group of TREM2 (A); Kruskal-Wallis analysis results for each group of DAP12 (B); Kruskal-Wallis analysis results for each group of iNOS (C); Kruskal-Wallis analysis results for each group of COX-2 (D); Kruskal-Wallis analysis results for each group of TLR4 (E); Kruskal-Wallis analysis results for each group of MyD88 (F); Kruskal-Wallis analysis results for each group of NLRP3 (G); Kruskal-Wallis analysis results for each group of Caspase-1 (H); Kruskal-Wallis analysis results for each group of IBA-1 (I); Kruskal-Wallis analysis results for each group of pTau/Tau (J).

**Table S1.** The results for TREM2 of Kruskal-Wallis ANOVA

| Group              | Median [ <i>P</i> 25, <i>P</i> 75] | H     | <i>P</i> |
|--------------------|------------------------------------|-------|----------|
| Normal             | 1.10 [1.04, 1.12]                  | 17.94 | 0.003    |
| Model**            | 0.76 [0.75, 0.77]                  |       |          |
| DPZ##              | 1.03 [0.98, 1.08]                  |       |          |
| LDS (400 µg/mL) ## | 1.06 [1.02, 1.08]                  |       |          |
| LDS (200 µg/mL) ## | 1.05 [1.04, 1.07]                  |       |          |
| LDS (100 µg/mL) ## | 0.91 [0.90, 0.95]                  |       |          |

**Table S2.** The results for Dap12 of Kruskal-Wallis ANOVA

| Group              | Median [ <i>P</i> 25, <i>P</i> 75] | H     | <i>P</i> |
|--------------------|------------------------------------|-------|----------|
| Normal             | 1.13 [1.07, 1.16]                  | 20.12 | 0.001    |
| Model **           | 0.84 [0.79, 0.89]                  |       |          |
| DPZ ##             | 1.00 [0.96, 1.07]                  |       |          |
| LDS (400 µg/mL) ## | 1.18 [1.13, 1.25]                  |       |          |
| LDS (200 µg/mL) ## | 1.06 [0.99, 1.09]                  |       |          |
| LDS (100 µg/mL) ## | 0.86 [0.84, 0.90]                  |       |          |

**Table S3.** The results for iNOS of Kruskal-Wallis ANOVA

| Group              | Median [ <i>P</i> 25, <i>P</i> 75] | H     | <i>P</i> |
|--------------------|------------------------------------|-------|----------|
| Normal             | 0.67 [0.64, 0.71]                  | 20.40 | 0.001    |
| Model **           | 1.53 [1.47, 1.71]                  |       |          |
| DPZ ##             | 0.94 [0.93, 0.99]                  |       |          |
| LDS (400 µg/mL) ## | 0.84 [0.84, 0.96]                  |       |          |
| LDS (200 µg/mL) ## | 0.94 [0.93, 1.06]                  |       |          |
| LDS (100 µg/mL) ## | 1.10 [1.05, 1.17]                  |       |          |

**Table S4.** The results for COX-2 of Kruskal-Wallis ANOVA

| Group              | Median [ <i>P</i> 25, <i>P</i> 75] | H     | <i>P</i> |
|--------------------|------------------------------------|-------|----------|
| Normal             | 1.00 [0.99, 1.08]                  | 21.32 | 0.002    |
| Model **           | 2.70 [2.67, 2.78]                  |       |          |
| DPZ ##             | 1.53 [1.47, 1.69]                  |       |          |
| LDS (400 µg/mL) ## | 1.50 [1.49, 1.51]                  |       |          |
| LDS (200 µg/mL) #  | 2.03 [2.01, 2.51]                  |       |          |
| LDS (100 µg/mL)    | 2.30 [2.19, 2.41]                  |       |          |

**Table S5.** The results for TLR4 of Kruskal-Wallis ANOVA

| Group              | Median [ <i>P</i> 25, <i>P</i> 75] | H     | <i>P</i> |
|--------------------|------------------------------------|-------|----------|
| Normal             | 1.00 [0.98, 1.01]                  | 21.50 | 0.007    |
| Model **           | 1.80 [1.79, 1.91]                  |       |          |
| DPZ ##             | 1.24 [1.22, 1.90]                  |       |          |
| LDS (400 µg/mL) ## | 1.10 [1.01, 1.17]                  |       |          |
| LDS (200 µg/mL) ## | 1.24 [1.21, 1.28]                  |       |          |
| LDS (100 µg/mL) #  | 1.64 [1.68, 1.55]                  |       |          |

**Table S6.** The results for MyD88 of Kruskal-Wallis ANOVA

| Group              | Median [ <i>P</i> 25, <i>P</i> 75] | H     | <i>P</i> |
|--------------------|------------------------------------|-------|----------|
| Normal             | 0.61 [0.57, 0.65]                  | 20.87 | 0.002    |
| Model *            | 1.44 [1.41, 1.45]                  |       |          |
| DPZ #              | 0.93 [0.86, 0.97]                  |       |          |
| LDS (400 µg/mL) ## | 1.02 [1.00, 1.09]                  |       |          |
| LDS (200 µg/mL) #  | 1.01 [0.98, 1.04]                  |       |          |
| LDS (100 µg/mL)    | 1.10 [1.04, 1.12]                  |       |          |

**Table S7.** The results for NLRP3 of Kruskal-Wallis ANOVA

| Group              | Median [ <i>P</i> 25, <i>P</i> 75] | H     | <i>P</i> |
|--------------------|------------------------------------|-------|----------|
| Normal             | 0.99 [0.96, 1.03]                  | 21.93 | 0.001    |
| Model **           | 2.61 [2.53, 2.80]                  |       |          |
| DPZ ##             | 1.48 [1.43, 1.53]                  |       |          |
| LDS (400 µg/mL) ## | 1.42 [1.38, 1.52]                  |       |          |
| LDS (200 µg/mL) ## | 1.81 [1.78, 1.90]                  |       |          |
| LDS (100 µg/mL) #  | 2.10 [1.04, 2.28]                  |       |          |

**Table S8.** The results for Caspase-1 of Kruskal-Wallis ANOVA

| Group              | Median [ <i>P</i> 25, <i>P</i> 75] | H     | <i>P</i> |
|--------------------|------------------------------------|-------|----------|
| Normal             | 1.03 [0.97, 1.08]                  | 20.83 | 0.003    |
| Model **           | 2.43 [2.21, 2.58]                  |       |          |
| DPZ ##             | 1.29 [1.26, 1.50]                  |       |          |
| LDS (400 µg/mL) ## | 1.22 [1.18, 1.35]                  |       |          |
| LDS (200 µg/mL) ## | 1.46 [1.43, 1.49]                  |       |          |
| LDS (100 µg/mL) #  | 1.57 [1.52, 1.67]                  |       |          |



**Table S9.** The results for IBA-1 of Kruskal-Wallis ANOVA

| Group              | Median [ <i>P</i> 25, <i>P</i> 75] | H     | <i>P</i> |
|--------------------|------------------------------------|-------|----------|
| Normal             | 1.00 [0.98, 1.07]                  |       |          |
| Model **           | 2.49 [2.29, 2.63]                  |       |          |
| DPZ ##             | 1.38 [1.30, 1.42]                  | 21.70 | 0.001    |
| LDS (400 µg/mL) ## | 1.32 [1.29, 1.36]                  |       |          |
| LDS (200 µg/mL) ## | 1.83 [1.76, 1.88]                  |       |          |
| LDS (100 µg/mL) #  | 2.05 [2.00, 2.23]                  |       |          |

**Table S10.** The results for p-Tau/Tau of Kruskal-Wallis ANOVA

| Group              | Median [ <i>P</i> 25, <i>P</i> 75] | H     | <i>P</i> |
|--------------------|------------------------------------|-------|----------|
| Normal             | 0.98 [0.95, 1.08]                  |       |          |
| Model **           | 1.88 [1.81, 1.98]                  |       |          |
| DPZ #              | 1.46 [1.68, 1.72]                  | 20.96 | 0.001    |
| LDS (400 µg/mL) ## | 1.18 [1.05, 1.30]                  |       |          |
| LDS (200 µg/mL) #  | 1.38 [1.34, 1.55]                  |       |          |
| LDS (100 µg/mL) #  | 1.63 [1.60, 1.71]                  |       |          |

\**P* < 0.05, \*\**P* < 0.01 vs. Control group; #*P* < 0.05, ##*P* < 0.01 vs. Model group.
